# Supplementary material
Source: PubMed Central journal article supplement (PMC3347713)
Supplement: NIHMS367034-supplement-T5.pdf [file NIHMS367034-supplement-T5.pdf]

**Supplemental Table 1: Genes significantly up-regulated in 3D (and  $\geq 1.5$  fold)**

| <b>Gene</b> | <b>Fold change</b> | <b>Gene Name</b>                                 |
|-------------|--------------------|--------------------------------------------------|
| GPNMB       | 9.51               | glycoprotein (transmembrane) nmb                 |
| SERPINA3    | 7.43               | serpin peptidase inhibitor, clade A, member 3    |
| ALOX15B     | 4.80               | arachidonate 15-lipoxygenase, type B             |
| C1R         | 4.12               | complement component 1, r subcomponent           |
| MAOA        | 3.93               | monoamine oxidase A                              |
| BTG1        | 3.28               | B-cell translocation gene 1, anti-proliferative  |
| HIST1H2BD   | 3.18               | histone cluster 1, H2bd                          |
| TMSB15B     | 3.15               | thymosin beta 15B                                |
| SEPP1       | 3.08               | selenoprotein P, plasma, 1                       |
| SCNN1B      | 3.02               | sodium channel, nonvoltage-gated 1, beta         |
| GSTA4       | 2.92               | glutathione S-transferase alpha 4                |
| ANG         | 2.90               | angiogenin, ribonuclease, RNase A family, 5      |
| SLC22A18    | 2.86               | solute carrier family 22, member 18              |
| IGBP1       | 2.84               | immunoglobulin (CD79A) binding protein 1         |
| YPEL5       | 2.81               | yippee-like 5 (Drosophila)                       |
| HIST3H2A    | 2.81               | histone cluster 3, H2a                           |
| NFIL3       | 2.77               | nuclear factor, interleukin 3 regulated          |
| NUPR1       | 2.68               | nuclear protein 1                                |
| TNNT1       | 2.67               | troponin T type 1 (skeletal, slow)               |
| ASS1        | 2.64               | argininosuccinate synthetase 1                   |
| GM2A        | 2.57               | GM2 ganglioside activator                        |
| HCFC1R1     | 2.56               | host cell factor C1 regulator 1 (XPO1 dependent) |
| TRAPPC6A    | 2.55               | trafficking protein particle complex 6A          |
| FANCE       | 2.53               | Fanconi anemia, complementation group E          |
| COL2A1      | 2.51               | collagen, type II, alpha 1                       |
| CSNK2A2     | 2.51               | casein kinase 2, alpha prime polypeptide         |
| UBE2L6      | 2.49               | ubiquitin-conjugating enzyme E2L 6               |
| C9orf16     | 2.44               | chromosome 9 open reading frame 16               |
| C6orf48     | 2.43               | chromosome 6 open reading frame 48               |
| NR1H3       | 2.43               | nuclear receptor subfamily 1, group H, member 3  |
| LOC391132   | 2.42               | similar to hCG2041276                            |
| GLUL        | 2.40               | glutamate-ammonia ligase (glutamine synthetase)  |

|           |      |                                                              |
|-----------|------|--------------------------------------------------------------|
| PFDN5     | 2.37 | prefoldin subunit 5                                          |
| PGLS      | 2.37 | 6-phosphogluconolactonase                                    |
| PDPN      | 2.34 | podoplanin                                                   |
| TMEM159   | 2.33 | transmembrane protein 159                                    |
| HS1BP3    | 2.31 | HCLS1 binding protein 3                                      |
| LETMD1    | 2.27 | LETM1 domain containing 1                                    |
| C3        | 2.25 | complement component 3                                       |
| HIST1H2BK | 2.23 | histone cluster 1, H2bk                                      |
| BCKDHA    | 2.21 | branched chain keto acid dehydrogenase E1, alpha             |
| ATP5G2    | 2.21 | ATP synthase, mitochondrial F0 complex, subunit C2           |
| GRN       | 2.21 | granulin                                                     |
| GLTSCR2   | 2.20 | glioma tumor suppressor candidate region gene 2              |
| CCNB1IP1  | 2.20 | cyclin B1 interacting protein 1                              |
| GCHFR     | 2.16 | GTP cyclohydrolase I feedback regulator                      |
| RPL36     | 2.15 | ribosomal protein L36                                        |
| MTSS1     | 2.14 | metastasis suppressor 1                                      |
| TSC2      | 2.14 | tuberous sclerosis 2                                         |
| TTLL1     | 2.14 | tubulin tyrosine ligase-like family, member 1                |
| VPS28     | 2.13 | vacuolar protein sorting 28 homolog ( <i>S. cerevisiae</i> ) |
| C14orf159 | 2.13 | chromosome 14 open reading frame 159                         |
| C21orf33  | 2.12 | chromosome 21 open reading frame 33                          |
| HEBP1     | 2.12 | heme binding protein 1                                       |
| GPX4      | 2.10 | glutathione peroxidase 4 (phospholipid hydroperoxidase)      |
| CTSB      | 2.09 | cathepsin B                                                  |
| CCDC51    | 2.08 | coiled-coil domain containing 51                             |
| RGS10     | 2.08 | regulator of G-protein signaling 10                          |
| CKB       | 2.06 | creatine kinase, brain                                       |
| EIF3G     | 2.06 | eukaryotic translation initiation factor 3, subunit G        |
| HDAC5     | 2.05 | histone deacetylase 5                                        |
| CTSF      | 2.04 | cathepsin F                                                  |
| MGMT      | 2.04 | O-6-methylguanine-DNA methyltransferase                      |
| CRYL1     | 2.04 | crystallin, lambda 1                                         |
| NME3      | 2.04 | non-metastatic cells 3, protein expressed in                 |
| C2orf28   | 2.04 | chromosome 2 open reading frame 28                           |
| TSC22D3   | 2.03 | TSC22 domain family, member 3                                |

|           |      |                                                             |
|-----------|------|-------------------------------------------------------------|
| ORAI3     | 2.03 | ORAI calcium release-activated calcium modulator 3          |
| POLR1D    | 2.02 | polymerase (RNA) I polypeptide D, 16kDa                     |
| CHI3L2    | 2.02 | chitinase 3-like 2                                          |
| PIGV      | 2.02 | phosphatidylinositol glycan anchor biosynthesis, class V    |
| UBXN1     | 2.00 | UBX domain protein 1                                        |
| LCMT1     | 2.00 | leucine carboxyl methyltransferase 1                        |
| RPS28P6   | 1.99 | ribosomal protein S28 pseudogene 6                          |
| GABARAP   | 1.98 | GABA(A) receptor-associated protein                         |
| H2BFS     | 1.98 | H2B histone family, member S                                |
| SURF1     | 1.98 | surfeit 1                                                   |
| ERGIC3    | 1.96 | ERGIC and golgi 3                                           |
| TP53TG1   | 1.96 | TP53 target 1 (non-protein coding)                          |
| PKIG      | 1.95 | protein kinase (cAMP-dependent, catalytic) inhibitor gamma  |
| RPL18AP6  | 1.94 | ribosomal protein L18a pseudogene 6                         |
| APOE      | 1.89 | apolipoprotein E                                            |
| LYPD3     | 1.87 | LY6/PLAUR domain containing 3                               |
| HIST1H2BE | 1.87 | histone cluster 1, H2be                                     |
| C1orf66   | 1.87 | chromosome 1 open reading frame 66                          |
| PRCP      | 1.87 | prolylcarboxypeptidase (angiotensinase C)                   |
| RAMP1     | 1.85 | receptor (G protein-coupled) activity modifying protein 1   |
| BCAS3     | 1.83 | breast carcinoma amplified sequence 3                       |
| SMPD1     | 1.83 | sphingomyelin phosphodiesterase 1, acid lysosomal           |
| NENF      | 1.83 | neuron derived neurotrophic factor                          |
| PSME1     | 1.82 | proteasome (prosome, macropain) activator subunit 1         |
| NUDT2     | 1.82 | nudix (nucleoside diphosphate linked moiety X)-type motif 2 |
| PRKCZ     | 1.82 | protein kinase C, zeta                                      |
| TIMM9     | 1.81 | translocase of inner mitochondrial membrane 9 homolog       |
| COX7A2L   | 1.81 | cytochrome c oxidase subunit VIIa polypeptide 2 like        |
| PEX6      | 1.80 | peroxisomal biogenesis factor 6                             |
| FHL3      | 1.78 | four and a half LIM domains 3                               |
| NDUFB11   | 1.78 | NADH dehydrogenase (ubiquinone) 1 beta subcomplex, 11       |
| JUNB      | 1.78 | jun B proto-oncogene                                        |
| DDIT3     | 1.76 | DNA-damage-inducible transcript 3                           |
| ZNF32     | 1.75 | zinc finger protein 32                                      |
| ZNF358    | 1.75 | zinc finger protein 358                                     |

|              |      |                                                       |
|--------------|------|-------------------------------------------------------|
| PRDX2        | 1.75 | peroxiredoxin 2                                       |
| CST3         | 1.75 | cystatin C                                            |
| RPS10P3      | 1.74 | ribosomal protein S10 pseudogene 3                    |
| SSR4         | 1.74 | signal sequence receptor, delta                       |
| CUTA         | 1.74 | cutA divalent cation tolerance homolog (E. coli)      |
| AIP          | 1.74 | aryl hydrocarbon receptor interacting protein         |
| HIST1H4J     | 1.73 | histone cluster 1, H4j                                |
| HIGD2A       | 1.73 | HIG1 domain family, member 2A                         |
| C12orf10     | 1.72 | chromosome 12 open reading frame 10                   |
| RPL10L       | 1.72 | ribosomal protein L10-like                            |
| MRPS18B      | 1.72 | mitochondrial ribosomal protein S18B                  |
| RNASET2      | 1.72 | ribonuclease T2                                       |
| NFKBIL1      | 1.72 | nuclear factor of kappa in B-cells inhibitor-like 1   |
| ITPKC        | 1.72 | inositol 1,4,5-trisphosphate 3-kinase C               |
| EIF3F        | 1.71 | eukaryotic translation initiation factor 3, subunit F |
| DNAJC12      | 1.71 | DnaJ (Hsp40) homolog, subfamily C, member 12          |
| NDUFA3       | 1.71 | NADH dehydrogenase (ubiquinone) 1 alpha subcomplex, 3 |
| C11orf60     | 1.71 | chromosome 11 open reading frame 60                   |
| WDR13        | 1.71 | WD repeat domain 13                                   |
| KLHDC4       | 1.71 | kelch domain containing 4                             |
| KIAA0141     | 1.70 | KIAA0141                                              |
| RP3-377H14.5 | 1.70 | hypothetical LOC285830                                |
| DEPDC6       | 1.70 | DEP domain containing 6                               |
| CRTAP        | 1.70 | cartilage associated protein                          |
| DCTN2        | 1.70 | dynactin 2 (p50)                                      |
| UBXN6        | 1.70 | UBX domain protein 6                                  |
| DNAL4        | 1.69 | dynein, axonemal, light chain 4                       |
| TOM1         | 1.69 | target of myb1 (chicken)                              |
| HBP1         | 1.69 | HMG-box transcription factor 1                        |
| SUPT4H1      | 1.69 | suppressor of Ty 4 homolog 1 (S. cerevisiae)          |
| CORO1B       | 1.69 | coronin, actin binding protein, 1B                    |
| THNSL2       | 1.69 | threonine synthase-like 2 (S. cerevisiae)             |
| MED16        | 1.69 | mediator complex subunit 16                           |
| C19orf56     | 1.67 | chromosome 19 open reading frame 56                   |
| PDCD4        | 1.66 | programmed cell death 4                               |

|           |      |                                                            |
|-----------|------|------------------------------------------------------------|
| ECHDC3    | 1.65 | enoyl Coenzyme A hydratase domain containing 3             |
| RAB13     | 1.65 | RAB13, member RAS oncogene family                          |
| TCEB2     | 1.65 | transcription elongation factor B (SIII), polypeptide 2    |
| EXOSC5    | 1.65 | exosome component 5                                        |
| CUEDC2    | 1.65 | CUE domain containing 2                                    |
| C14orf93  | 1.65 | chromosome 14 open reading frame 93                        |
| TADA3L    | 1.64 | transcriptional adaptor 3 (NGG1 homolog, yeast)-like       |
| GMPR2     | 1.64 | guanosine monophosphate reductase 2                        |
| STOM      | 1.64 | stomatin                                                   |
| ERMAP     | 1.64 | erythroblast membrane-associated protein                   |
| COX5B     | 1.63 | cytochrome c oxidase subunit Vb                            |
| RPL29P11  | 1.63 | ribosomal protein L29 pseudogene 11                        |
| VAT1      | 1.63 | vesicle amine transport protein 1 homolog (T. californica) |
| LOC201229 | 1.63 | hypothetical protein LOC201229                             |
| IFI6      | 1.63 | interferon, alpha-inducible protein 6                      |
| RPS10P11  | 1.62 | ribosomal protein S10 pseudogene 11                        |
| CRBN      | 1.61 | cereblon                                                   |
| BTBD2     | 1.61 | BTB (POZ) domain containing 2                              |
| PSAP      | 1.61 | prosaposin                                                 |
| MANBA     | 1.61 | mannosidase, beta A, lysosomal                             |
| ACSM3     | 1.60 | acyl-CoA synthetase medium-chain family member 3           |
| MYO1F     | 1.60 | myosin IF                                                  |
| RARRES3   | 1.59 | retinoic acid receptor responder (tazarotene induced) 3    |
| SIRT2     | 1.59 | sirtuin 2                                                  |
| CIDEB     | 1.59 | cell death-inducing DFFA-like effector b                   |
| C1orf50   | 1.59 | chromosome 1 open reading frame 50                         |
| ARL4D     | 1.58 | ADP-ribosylation factor-like 4D                            |
| COX6B1    | 1.58 | cytochrome c oxidase subunit Vib polypeptide 1             |
| TMED1     | 1.57 | transmembrane emp24 protein transport domain 1             |
| ZNHIT1    | 1.57 | zinc finger, HIT type 1                                    |
| C11orf10  | 1.57 | chromosome 11 open reading frame 10                        |
| ABHD14A   | 1.57 | abhydrolase domain containing 14A                          |
| C4A       | 1.57 | complement component 4A (Rodgers blood group)              |
| HIST1H1D  | 1.56 | histone cluster 1, H1d                                     |
| RTN1      | 1.56 | reticulon 1                                                |

|              |      |                                                              |
|--------------|------|--------------------------------------------------------------|
| GDI1         | 1.56 | GDP dissociation inhibitor 1                                 |
| RRAGD        | 1.56 | Ras-related GTP binding D                                    |
| RPL14        | 1.56 | ribosomal protein L14                                        |
| ZNF34        | 1.55 | zinc finger protein 34                                       |
| VPS11        | 1.54 | vacuolar protein sorting 11 homolog (S. cerevisiae)          |
| APH1B        | 1.53 | anterior pharynx defective 1 homolog B (C. elegans)          |
| NECAB3       | 1.53 | N-terminal EF-hand calcium binding protein 3                 |
| LOC100129250 | 1.53 | similar to hCG1811779                                        |
| DYRK4        | 1.52 | dual-specificity tyrosine-phosphorylation regulated kinase 4 |
| UQCR         | 1.52 | ubiquinol-cytochrome c reductase, 6.4kDa subunit             |
| CPNE1        | 1.52 | copine I                                                     |
| LRRC23       | 1.52 | leucine rich repeat containing 23                            |
| TSPAN4       | 1.52 | tetraspanin 4                                                |
| TM9SF1       | 1.52 | transmembrane 9 superfamily member 1                         |
| MAPK3        | 1.52 | mitogen-activated protein kinase 3                           |
| C12orf39     | 1.51 | chromosome 12 open reading frame 39                          |
| HIST1H2AE    | 1.51 | histone cluster 1, H2ae                                      |
| C19orf53     | 1.51 | chromosome 19 open reading frame 53                          |
| MAN1B1       | 1.51 | mannosidase, alpha, class 1B, member 1                       |

**Supplemental Table 2: Genes significantly down-regulated in 3D (and  $\leq 0.5$  fold)**

| <b>Gene</b> | <b>Fold change</b> | <b>Gene Name</b>                                            |
|-------------|--------------------|-------------------------------------------------------------|
| ASPM        | 0.09               | asp (abnormal spindle) homolog, microcephaly associated     |
| CEP55       | 0.13               | centrosomal protein 55kDa                                   |
| PBK         | 0.15               | PDZ binding kinase                                          |
| KIF14       | 0.16               | kinesin family member 14                                    |
| CENPF       | 0.16               | centromere protein F, 350/400ka (mitosin)                   |
| DLGAP5      | 0.18               | discs, large (Drosophila) homolog-associated protein 5      |
| HMMR        | 0.19               | hyaluronan-mediated motility receptor (RHAMM)               |
| ZWILCH      | 0.19               | Zwilch, kinetochore associated, homolog (Drosophila)        |
| ECT2        | 0.19               | epithelial cell transforming sequence 2 oncogene            |
| CCNA2       | 0.21               | cyclin A2                                                   |
| SMC4        | 0.21               | structural maintenance of chromosomes 4                     |
| KIF11       | 0.21               | kinesin family member 11                                    |
| HMGCS1      | 0.21               | 3-hydroxy-3-methylglutaryl-Coenzyme A synthase 1            |
| SLC26A2     | 0.22               | solute carrier family 26 (sulfate transporter), member 2    |
| CDKN3       | 0.22               | cyclin-dependent kinase inhibitor 3                         |
| RRM2        | 0.22               | ribonucleotide reductase M2 polypeptide                     |
| CDC2        | 0.23               | cell division cycle 2, G1 to S and G2 to M                  |
| TTK         | 0.23               | TTK protein kinase                                          |
| MLF1IP      | 0.24               | MLF1 interacting protein                                    |
| ATAD2       | 0.25               | ATPase family, AAA domain containing 2                      |
| HELLS       | 0.26               | helicase, lymphoid-specific                                 |
| CDC20       | 0.26               | cell division cycle 20 homolog ( <i>S. cerevisiae</i> )     |
| GOLGA8A     | 0.26               | golgi autoantigen, golgin subfamily a, 8A                   |
| KRT81       | 0.26               | keratin 81                                                  |
| ELOVL6      | 0.26               | ELOVL family member 6, elongation of long chain fatty acids |
| CENPE       | 0.26               | centromere protein E, 312kDa                                |
| CDC6        | 0.27               | cell division cycle 6 homolog ( <i>S. cerevisiae</i> )      |
| VCAN        | 0.27               | versican                                                    |
| LMNB1       | 0.28               | lamin B1                                                    |
| PRC1        | 0.28               | protein regulator of cytokinesis 1                          |
| XIST        | 0.28               | X (inactive)-specific transcript (non-protein coding)       |
| BUB1B       | 0.28               | budding uninhibited by benzimidazoles 1 homolog beta        |
| CCNB1       | 0.29               | cyclin B1                                                   |
| MKI67       | 0.29               | antigen identified by monoclonal antibody Ki-67             |
| ANP32E      | 0.29               | acidic nuclear phosphoprotein 32 family, member E           |
| SLC2A3P1    | 0.29               | solute carrier family 2, member 3 pseudogene 1              |
| ARHGAP29    | 0.30               | Rho GTPase activating protein 29                            |
| NCAPG2      | 0.30               | non-SMC condensin II complex, subunit G2                    |
| FBN2        | 0.30               | fibrillin 2                                                 |
| NUSAP1      | 0.30               | nucleolar and spindle associated protein 1                  |
| MAD2L1      | 0.30               | MAD2 mitotic arrest deficient-like 1 (yeast)                |
| NCAPG       | 0.30               | non-SMC condensin I complex, subunit G                      |
| CASP8AP2    | 0.30               | caspase 8 associated protein 2                              |
| TDG         | 0.31               | thymine-DNA glycosylase                                     |
| CCDC99      | 0.31               | coiled-coil domain containing 99                            |

|           |      |                                                                 |
|-----------|------|-----------------------------------------------------------------|
| MCM10     | 0.31 | minichromosome maintenance complex component 10                 |
| GIN51     | 0.31 | GIN5 complex subunit 1 (Psf1 homolog)                           |
| DHFR      | 0.31 | dihydrofolate reductase                                         |
| BARD1     | 0.31 | BRCA1 associated RING domain 1                                  |
| ARHGDI3   | 0.32 | Rho GDP dissociation inhibitor (GDI) beta                       |
| PIK3C2A   | 0.32 | phosphoinositide-3-kinase, class 2, alpha polypeptide           |
| SHCBP1    | 0.32 | SHC SH2-domain binding protein 1                                |
| USP1      | 0.32 | ubiquitin specific peptidase 1                                  |
| SMC2      | 0.32 | structural maintenance of chromosomes 2                         |
| KPNA2     | 0.32 | karyopherin alpha 2 (RAG cohort 1, importin alpha 1)            |
| TPX2      | 0.32 | TPX2, microtubule-associated, homolog ( <i>Xenopus laevis</i> ) |
| BUB1      | 0.33 | budding uninhibited by benzimidazoles 1 homolog (yeast)         |
| DEPDC1    | 0.33 | DEP domain containing 1                                         |
| SMC1A     | 0.33 | structural maintenance of chromosomes 1A                        |
| OIP5      | 0.33 | Opa interacting protein 5                                       |
| SACS      | 0.33 | spastic ataxia of Charlevoix-Saguenay (sacsin)                  |
| CHST6     | 0.33 | carbohydrate (N-acetylglucosamine 6-O) sulfotransferase 6       |
| NUDT15    | 0.33 | nudix (nucleoside diphosphate linked moiety X)-type motif 15    |
| SFRS7     | 0.34 | splicing factor, arginine/serine-rich 7, 35kDa                  |
| KIF23     | 0.34 | kinesin family member 23                                        |
| GALNT7    | 0.34 | N-acetylgalactosaminyltransferase 7 (GalNAc-T7)                 |
| HNRNPA2B1 | 0.34 | heterogeneous nuclear ribonucleoprotein A2/B1                   |
| CHD1      | 0.34 | chromodomain helicase DNA binding protein 1                     |
| AURKA     | 0.34 | aurora kinase A                                                 |
| WHSC1     | 0.35 | Wolf-Hirschhorn syndrome candidate 1                            |
| KIF18A    | 0.35 | kinesin family member 18A                                       |
| TOP2B     | 0.35 | topoisomerase (DNA) II beta 180kDa                              |
| NETO2     | 0.35 | neuropilin (NRP) and tolloid (TLL)-like 2                       |
| PHIP      | 0.35 | pleckstrin homology domain interacting protein                  |
| MELK      | 0.35 | maternal embryonic leucine zipper kinase                        |
| CDC7      | 0.35 | cell division cycle 7 homolog ( <i>S. cerevisiae</i> )          |
| FAT1      | 0.35 | FAT tumor suppressor homolog 1 ( <i>Drosophila</i> )            |
| C10orf18  | 0.35 | chromosome 10 open reading frame 18                             |
| PLK1      | 0.35 | polo-like kinase 1 ( <i>Drosophila</i> )                        |
| VRK1      | 0.35 | vaccinia related kinase 1                                       |
| RFC3      | 0.36 | replication factor C (activator 1) 3, 38kDa                     |
| MBNL1     | 0.36 | muscleblind-like ( <i>Drosophila</i> )                          |
| SLC30A1   | 0.36 | solute carrier family 30 (zinc transporter), member 1           |
| LBR       | 0.36 | lamin B receptor                                                |
| CCNB2     | 0.36 | cyclin B2                                                       |
| DENND1B   | 0.36 | DENN/MADD domain containing 1B                                  |
| ARID4B    | 0.36 | AT rich interactive domain 4B (RBP1-like)                       |
| CKS2      | 0.37 | CDC28 protein kinase regulatory subunit 2                       |
| KIF4A     | 0.37 | kinesin family member 4A                                        |
| TMPO      | 0.37 | thymopoietin                                                    |
| FANCI     | 0.37 | Fanconi anemia, complementation group I                         |
| TYMS      | 0.38 | thymidylate synthetase                                          |

|           |      |                                                             |
|-----------|------|-------------------------------------------------------------|
| TRIP13    | 0.38 | thyroid hormone receptor interactor 13                      |
| SMC3      | 0.38 | structural maintenance of chromosomes 3                     |
| DEK       | 0.38 | DEK oncogene                                                |
| SFRS2     | 0.38 | splicing factor, arginine/serine-rich 2                     |
| SFRS18    | 0.38 | splicing factor, arginine/serine-rich 18                    |
| POLR3G    | 0.38 | polymerase (RNA) III (DNA directed) polypeptide G (32kD)    |
| LARP4     | 0.38 | La ribonucleoprotein domain family, member 4                |
| SUZ12     | 0.38 | suppressor of zeste 12 homolog (Drosophila)                 |
| TBL1XR1   | 0.39 | transducin (beta)-like 1 X-linked receptor 1                |
| KIAA0101  | 0.39 | KIAA0101                                                    |
| TCERG1    | 0.39 | transcription elongation regulator 1                        |
| KIF2A     | 0.39 | kinesin heavy chain member 2A                               |
| UBE2S     | 0.39 | ubiquitin-conjugating enzyme E2S                            |
| REV3L     | 0.39 | REV3-like, catalytic subunit of DNA polymerase zeta (yeast) |
| ATR       | 0.39 | ataxia telangiectasia and Rad3 related                      |
| NASP      | 0.39 | nuclear autoantigenic sperm protein (histone-binding)       |
| PLK4      | 0.39 | polo-like kinase 4 (Drosophila)                             |
| KIF15     | 0.40 | kinesin family member 15                                    |
| BIRC5     | 0.40 | baculoviral IAP repeat-containing 5                         |
| XPO1      | 0.40 | exportin 1 (CRM1 homolog, yeast)                            |
| C3orf63   | 0.40 | chromosome 3 open reading frame 63                          |
| TARDBP    | 0.40 | TAR DNA binding protein                                     |
| PRR11     | 0.41 | proline rich 11                                             |
| RAD51AP1  | 0.41 | RAD51 associated protein 1                                  |
| DDX21     | 0.41 | DEAD (Asp-Glu-Ala-Asp) box polypeptide 21                   |
| PHACTR2   | 0.41 | phosphatase and actin regulator 2                           |
| LMNB2     | 0.41 | lamin B2                                                    |
| NCBP1     | 0.41 | nuclear cap binding protein subunit 1, 80kDa                |
| SEPHS1    | 0.41 | selenophosphate synthetase 1                                |
| PRPF4B    | 0.41 | PRP4 pre-mRNA processing factor 4 homolog B (yeast)         |
| FKBP11    | 0.41 | FK506 binding protein 11, 19 kDa                            |
| GGH       | 0.41 | gamma-glutamyl hydrolase                                    |
| FLRT2     | 0.42 | fibronectin leucine rich transmembrane protein 2            |
| DNAJA1    | 0.42 | DnaJ (Hsp40) homolog, subfamily A, member 1                 |
| LDLR      | 0.42 | low density lipoprotein receptor                            |
| HNRNPA3P1 | 0.42 | heterogeneous nuclear ribonucleoprotein A3 pseudogene 1     |
| CENPN     | 0.42 | centromere protein N                                        |
| PDSS1     | 0.42 | prenyl (decaprenyl) diphosphate synthase, subunit 1         |
| MYO5C     | 0.43 | myosin VC                                                   |
| MCM7      | 0.43 | minichromosome maintenance complex component 7              |
| SLC38A1   | 0.43 | solute carrier family 38, member 1                          |
| CCNE2     | 0.43 | cyclin E2                                                   |
| CAPRN2    | 0.43 | caprin family member 2                                      |
| RC3H2     | 0.43 | ring finger and CCCH-type zinc finger domains 2             |
| BCLAF1    | 0.43 | BCL2-associated transcription factor 1                      |
| HNRNPR    | 0.43 | heterogeneous nuclear ribonucleoprotein R                   |
| TOP1      | 0.43 | topoisomerase (DNA) I                                       |

|              |      |                                                              |
|--------------|------|--------------------------------------------------------------|
| CIT          | 0.43 | citron (rho-interacting, serine/threonine kinase 21)         |
| PUS7         | 0.43 | pseudouridylate synthase 7 homolog ( <i>S. cerevisiae</i> )  |
| CDCA3        | 0.44 | cell division cycle associated 3                             |
| UCHL5        | 0.44 | ubiquitin carboxyl-terminal hydrolase L5                     |
| BAT2D1       | 0.44 | BAT2 domain containing 1                                     |
| TMEM194A     | 0.44 | transmembrane protein 194A                                   |
| TMEM41B      | 0.44 | transmembrane protein 41B                                    |
| PTPRG        | 0.44 | protein tyrosine phosphatase, receptor type, G               |
| ASXL2        | 0.44 | additional sex combs like 2 ( <i>Drosophila</i> )            |
| ACAT2        | 0.44 | acetyl-Coenzyme A acetyltransferase 2                        |
| SPAG5        | 0.45 | sperm associated antigen 5                                   |
| SLC43A3      | 0.45 | solute carrier family 43, member 3                           |
| EIF4E        | 0.45 | eukaryotic translation initiation factor 4E                  |
| FNBP4        | 0.45 | formin binding protein 4                                     |
| PSMD11       | 0.45 | proteasome 26S subunit, non-ATPase, 11                       |
| LPGAT1       | 0.45 | lysophosphatidylglycerol acyltransferase 1                   |
| GRAMD3       | 0.45 | GRAM domain containing 3                                     |
| HERC2P2      | 0.45 | hect domain and RLD 2 pseudogene 2                           |
| LOC152719    | 0.46 | hypothetical protein LOC152719                               |
| DHX29        | 0.46 | DEAH (Asp-Glu-Ala-His) box polypeptide 29                    |
| ATP2B1       | 0.46 | ATPase, Ca <sup>++</sup> transporting, plasma membrane 1     |
| EDEM3        | 0.46 | ER degradation enhancer, mannosidase alpha-like 3            |
| LOC100134401 | 0.46 | hypothetical protein LOC100134401                            |
| MCM6         | 0.46 | minichromosome maintenance complex component 6               |
| RBBP8        | 0.46 | retinoblastoma binding protein 8                             |
| SLTM         | 0.46 | SAFB-like, transcription modulator                           |
| FBXW12       | 0.46 | F-box and WD repeat domain containing 12                     |
| AKAP9        | 0.47 | A kinase (PRKA) anchor protein (yotiao) 9                    |
| PCNA         | 0.47 | proliferating cell nuclear antigen                           |
| ORC6L        | 0.47 | origin recognition complex, subunit 6 like (yeast)           |
| HMGB1        | 0.47 | high-mobility group box 1                                    |
| MPHOSPH9     | 0.47 | M-phase phosphoprotein 9                                     |
| CSE1L        | 0.47 | CSE1 chromosome segregation 1-like (yeast)                   |
| NOL8         | 0.47 | nucleolar protein 8                                          |
| C21orf66     | 0.47 | chromosome 21 open reading frame 66                          |
| UBP1         | 0.47 | upstream binding protein 1 (LBP-1a)                          |
| KIF5B        | 0.47 | kinesin family member 5B                                     |
| CHSY1        | 0.47 | chondroitin sulfate synthase 1                               |
| C1orf112     | 0.47 | chromosome 1 open reading frame 112                          |
| TJP1         | 0.48 | tight junction protein 1 (zona occludens 1)                  |
| TROVE2       | 0.48 | TROVE domain family, member 2                                |
| CCNL1        | 0.48 | cyclin L1                                                    |
| SSB          | 0.48 | Sjogren syndrome antigen B (autoantigen La)                  |
| POLE2        | 0.48 | polymerase (DNA directed), epsilon 2 (p59 subunit)           |
| ZMPSTE24     | 0.48 | zinc metallopeptidase (STE24 homolog, <i>S. cerevisiae</i> ) |
| TOPBP1       | 0.48 | topoisomerase (DNA) II binding protein 1                     |
| NUP107       | 0.48 | nucleoporin 107kDa                                           |

|          |      |                                                                |
|----------|------|----------------------------------------------------------------|
| RANBP1   | 0.48 | RAN binding protein 1                                          |
| ATAD2B   | 0.48 | ATPase family, AAA domain containing 2B                        |
| CDC25C   | 0.49 | cell division cycle 25 homolog C ( <i>S. pombe</i> )           |
| ZNF131   | 0.49 | zinc finger protein 131                                        |
| OXCT1    | 0.49 | 3-oxoacid CoA transferase 1                                    |
| ZC3H11A  | 0.49 | zinc finger CCCH-type containing 11A                           |
| SEPT11   | 0.49 | septin 11                                                      |
| SYNCRIP  | 0.49 | synaptotagmin binding, cytoplasmic RNA interacting protein     |
| SFRP1    | 0.49 | secreted frizzled-related protein 1                            |
| RBBP7    | 0.49 | retinoblastoma binding protein 7                               |
| FAM13B   | 0.49 | family with sequence similarity 13, member B                   |
| RBM25    | 0.49 | RNA binding motif protein 25                                   |
| HSP90AA1 | 0.49 | heat shock protein 90kDa alpha (cytosolic), class A member 1   |
| H2AFZ    | 0.49 | H2A histone family, member Z                                   |
| SETD5    | 0.49 | SET domain containing 5                                        |
| TLK1     | 0.49 | tousled-like kinase 1                                          |
| NBPF14   | 0.50 | neuroblastoma breakpoint family, member 14                     |
| TK1      | 0.50 | thymidine kinase 1, soluble                                    |
| CNOT6    | 0.50 | CCR4-NOT transcription complex, subunit 6                      |
| RAD51C   | 0.50 | RAD51 homolog C ( <i>S. cerevisiae</i> )                       |
| MTF2     | 0.50 | metal response element binding transcription factor 2          |
| PSMD14   | 0.50 | proteasome 26S subunit, non-ATPase, 14                         |
| DCLRE1C  | 0.50 | DNA cross-link repair 1C (PSO2 homolog, <i>S. cerevisiae</i> ) |

**Supplemental Table 3: Myc target genes significantly up-regulated in 3D (and  $\geq 1.5$  fold)**

| <b>Gene</b> | <b>Fold change</b> | <b>Response to Myc</b> | <b>Function</b>                        |
|-------------|--------------------|------------------------|----------------------------------------|
| BTG1        | 3.28               | Up-regulated           | Tumor Suppressor                       |
| IGBP1       | 2.84               | -                      | Receptor                               |
| NFIL3       | 2.77               | -                      | Transcription factor                   |
| RRAS        | 2.67               | -                      | -                                      |
| LOX         | 2.61               | Down-regulated         | Extracellular matrix                   |
| GM2A        | 2.57               | Down-regulated         | Metabolism                             |
| NDRG1       | 2.40               | Down-regulated         | Differentiation, Proliferation         |
| ADM         | 2.33               | Down-regulated         | Ligand, Stress Response                |
| GBP2        | 2.23               | Down-regulated         | Signal Transduction                    |
| BCKDHA      | 2.21               | -                      | Metabolism                             |
| ATP5G2      | 2.21               | -                      | -                                      |
| TSC2        | 2.14               | -                      | Signal Transduction                    |
| HEBP1       | 2.12               | -                      | -                                      |
| CTSB        | 2.09               | Down-regulated         | Protein degradation                    |
| CTSF        | 2.04               | -                      | Protease inhibitor , Protease          |
| CRYAB       | 2.01               | Down-regulated         | Chaperones, Protein folding, Apoptosis |
| GABARAP     | 1.98               | -                      | Cell structure                         |
| H2BFS       | 1.98               | -                      | Chromatin                              |
| LAMP2       | 1.93               | Down-regulated         | Nucleolus, Immune response             |
| FAH         | 1.92               | -                      | Metabolism, Amino Acid                 |
| MXI1        | 1.91               | Up-regulated           | Transcription                          |
| GAA         | 1.90               | Down-regulated         | Carbohydrate degradation, Metabolism   |
| HIST1H2BE   | 1.87               | -                      | Chromatin                              |
| HSPB1       | 1.85               | Down-regulated         | Apoptosis, Protein folding             |
| SRD5A1      | 1.83               | -                      | Steroid, Metabolism                    |
| TIMM9       | 1.81               | -                      | -                                      |
| COX7A2L     | 1.81               | -                      | Metabolism                             |
| ISG20       | 1.81               | -                      | Miscellaneous                          |
| PEX6        | 1.80               | -                      | -                                      |
| JUNB        | 1.78               | -                      | Transcription factor                   |
| MAN2B1      | 1.77               | Down-regulated         | Golgi processing enzyme, Metabolism    |
| HIST1H2BH   | 1.76               | -                      | Chromatin                              |
| POLD4       | 1.76               | -                      | DNA replication                        |
| DDIT3       | 1.76               | Down-regulated         | Cell Proliferation                     |
| NFKBIL1     | 1.72               | -                      | Signal Transduction                    |
| HBP1        | 1.69               | -                      | Chromatin                              |
| SARS        | 1.68               | -                      | Protein Synthesis                      |
| AKR7A2      | 1.67               | -                      | Metabolism                             |
| SRRM2       | 1.66               | -                      | -                                      |
| MAP2K5      | 1.65               | -                      | Signal Transduction                    |
| EXOSC5      | 1.65               | Up-regulated           | Metabolism, RNA                        |
| PTOV1       | 1.65               | -                      | -                                      |
| MEIS1       | 1.65               | -                      | Transcription factor                   |
| DGCR6       | 1.62               | -                      | Cell adhesion                          |
| PFKM        | 1.62               | Up-regulated           | Metabolism, Glycolysis                 |

|           |      |                |                                   |
|-----------|------|----------------|-----------------------------------|
| HIST2H2BE | 1.61 | -              | Chromatin                         |
| PSAP      | 1.61 | -              | Lipid , Metabolism                |
| SLC2A1    | 1.60 | Up-regulated   | Metabolism, Transport, Glycolysis |
| HIST1H2BI | 1.59 | -              | Chromatin                         |
| HADHB     | 1.59 | -              | Metabolism                        |
| EEF2      | 1.58 | Up-regulated   | Protein Synthesis                 |
| HIST1H2BF | 1.57 | -              | Chromatin                         |
| GDI1      | 1.56 | Down-regulated | Signal Transduction               |
| AP4M1     | 1.55 | -              | Transport                         |
| COX15     | 1.54 | -              | -                                 |
| MAP4      | 1.53 | Up-regulated   | Cell structure                    |
| RAC2      | 1.53 | -              | Signal Transduction               |
| MAPK3     | 1.52 | Down-regulated | Signal Transduction               |
| DDB1      | 1.51 | -              | DNA repair                        |
| ACYP2     | 1.51 | -              | Metabolism                        |
| PTPRF     | 1.51 | -              | Signal Transduction               |

**Supplemental Table 4: Myc target genes significantly down-regulated in 3D (and  $\leq 0.5$  fold)**

| <b>Gene</b> | <b>Fold change</b> | <b>Response to Myc</b> | <b>Function</b>                          |
|-------------|--------------------|------------------------|------------------------------------------|
| HMMR        | 0.19               | -                      | Receptor                                 |
| CCNA2       | 0.21               | Up-regulated           | Cell Cycle                               |
| CDC2        | 0.23               | Up-regulated           | Cell Cycle                               |
| CDC6        | 0.27               | -                      | Cell Cycle                               |
| FOXM1       | 0.27               | -                      | Transcription factor                     |
| SFRS1       | 0.28               | Up-regulated           | RNA Processing                           |
| KIF20A      | 0.29               | -                      | -                                        |
| CCNB1       | 0.29               | Up-regulated           | Cell Cycle                               |
| FBN2        | 0.30               | Up-regulated           | Cell adhesion                            |
| MAD2L1      | 0.30               | -                      | Cell Cycle                               |
| CASP8AP2    | 0.30               | -                      | Apoptosis                                |
| DHFR        | 0.31               | Up-regulated           | Metabolism, DNA                          |
| BARD1       | 0.31               | -                      | Signal Transduction                      |
| ARHGDI3     | 0.32               | Up-regulated           | Signal Transduction                      |
| USP1        | 0.32               | -                      | Protein degradation                      |
| SLC20A1     | 0.33               | Up-regulated           | Transport                                |
| SFRS7       | 0.34               | Up-regulated           | Transcription, Splicing                  |
| LRP8        | 0.35               | Up-regulated           | Metabolism, Lipid                        |
| VRK1        | 0.35               | Up-regulated           | Nucleotide, DNA synthesis, Metabolism    |
| COL4A2      | 0.36               | -                      | Extracellular matrix, Cell adhesion      |
| LBR         | 0.36               | -                      | Nuclear regulatory factors               |
| CKS2        | 0.37               | Up-regulated           | Cell Cycle                               |
| TYMS        | 0.38               | Up-regulated           | Metabolism                               |
| SFRS2       | 0.38               | Up-regulated           | RNA Processing                           |
| ATR         | 0.39               | Up-regulated           | DNA damage repair, Cell cycle checkpoint |
| MSH2        | 0.39               | Up-regulated           | Metabolism, DNA repair                   |
| ADAM9       | 0.39               | Up-regulated           | Signal Transduction                      |
| CD2AP       | 0.40               | -                      | Cytoskeletal protein                     |
| DDX21       | 0.41               | Up-regulated           | Nucleolus, RNA binding proteins          |
| PRKDC       | 0.41               | -                      | DNA repair, Chromatin                    |
| TFRC        | 0.41               | Up-regulated           | Transport, Metabolism, Iron              |
| NCBP1       | 0.41               | -                      | RNA binding proteins                     |
| GGH         | 0.41               | Up-regulated           | Protein degradation                      |
| ITGA6       | 0.42               | -                      | Cell adhesion, Extracellular matrix      |
| PPP1R12A    | 0.42               | -                      | -                                        |
| MCM7        | 0.43               | -                      | Chromatin, DNA repair                    |
| TOP1        | 0.43               | Up-regulated           | DNA modification, DNA repair             |
| MAP4K5      | 0.44               | -                      | Signal Transduction                      |
| H2AFX       | 0.45               | -                      | Chromatin                                |
| PMS1        | 0.45               | -                      | DNA repair                               |
| EIF4E       | 0.45               | Up-regulated           | Translation, Protein Synthesis           |
| IER3        | 0.46               | Down-regulated         | Apoptosis                                |
| RFC4        | 0.46               | Up-regulated           | Nucleotide, Metabolism, DNA synthesis    |
| EXO1        | 0.46               | -                      | -                                        |
| MCM6        | 0.46               | Up-regulated           | DNA replication                          |

|          |      |                |                                       |
|----------|------|----------------|---------------------------------------|
| RBBP8    | 0.46 | -              | Cell Cycle                            |
| FBXO5    | 0.46 | -              | -                                     |
| CUL5     | 0.46 | -              | -                                     |
| AKAP9    | 0.47 | -              | Signal Transduction                   |
| DCK      | 0.47 | -              | Nucleotide, Metabolism                |
| PCNA     | 0.47 | Up-regulated   | Cell Cycle                            |
| AGPS     | 0.47 | -              | Metabolism                            |
| SCD      | 0.47 | -              | Metabolism, Lipid                     |
| MCM3     | 0.47 | -              | DNA replication                       |
| SSB      | 0.48 | -              | RNA Processing                        |
| FASN     | 0.48 | Up-regulated   | Lipid , Metabolism                    |
| ZMPSTE24 | 0.48 | -              | Membrane protein                      |
| TOPBP1   | 0.48 | -              | DNA modification                      |
| RANBP1   | 0.48 | Up-regulated   | RNA transport, Protein                |
| MCM4     | 0.48 | Up-regulated   | Metabolism, DNA synthesis, Nucleotide |
| CDC25C   | 0.49 | Up-regulated   | Cell Cycle                            |
| MAN2A1   | 0.49 | -              | Metabolism                            |
| MCM5     | 0.49 | -              | DNA replication                       |
| HNRPDL   | 0.49 | -              | RNA binding proteins, Nucleolus       |
| H2AFZ    | 0.49 | Up-regulated   | Chromatin                             |
| THBS1    | 0.49 | Down-regulated | Angiogenesis, Metastasis              |
| UBE2C    | 0.49 | Up-regulated   | Protein Synthesis, Degradation        |
| TK1      | 0.50 | Up-regulated   | DNA enzyme, Metabolism                |
| SUCLA2   | 0.50 | Down-regulated | Metabolism                            |
| MYO1B    | 0.50 | Down-regulated | Cytoskeletal protein                  |
| EEF1E1   | 0.50 | -              | Protein Synthesis                     |
| TFAM     | 0.50 | Up-regulated   | Immune response                       |

**Supplemental Table 5: Calculation of Myc overexpression in 3D relative to 2D**

| <b>Sample</b>                     | <b>IR Signal (Normalized to Actin)</b> | <b>Femtomoles per 10<sup>5</sup> cells</b> | <b>Molecules per cell</b> | <b>Fold overexpression</b> |
|-----------------------------------|----------------------------------------|--------------------------------------------|---------------------------|----------------------------|
| Lane 1: lacZ                      | 0                                      | 0                                          | 0                         | 0                          |
| Lane 2: WT Myc                    | 64.8                                   | 33.0                                       | 198817                    | 7.1                        |
| Lane 3: T58A Myc                  | 90.7                                   | 46.2                                       | 278174                    | 9.9                        |
| Lane 4: S62A Myc                  | 114.3                                  | 58.2                                       | 350600                    | 12.4                       |
| Lane 5: T58A S62A Myc             | 123.8                                  | 63.0                                       | 379505                    | 13.5                       |
| Lane 6: ΔCPD Myc                  | 81.4                                   | 41.4                                       | 249555                    | 8.9                        |
| Lane 7: ΔMBII Myc                 | 50.3                                   | 25.6                                       | 154293                    | 5.5                        |
| Lane 8: ΔMBIII Myc                | 53.0                                   | 27.0                                       | 162457                    | 5.8                        |
| Standard Curve (signal/femtomole) | 2.0                                    |                                            |                           |                            |
| 0 femtomoles                      | 0                                      |                                            |                           |                            |
| 50 femtomoles                     | 96.4                                   |                                            |                           |                            |
| 100 femtomoles                    | 198.2                                  |                                            |                           |                            |
| 2D endogenous Myc (Adeno-lacZ)    | 0.26                                   | 4.7                                        | 28178                     | 1                          |
| Standard Curve (signal/femtomole) | 0.06                                   |                                            |                           |                            |
| 0 femtomoles                      | 0                                      |                                            |                           |                            |
| 100 femtomoles                    | 5.7                                    |                                            |                           |                            |
| 200 femtomoles                    | 11.0                                   |                                            |                           |                            |
