# Supplementary material
Source: PubMed Central journal article supplement (PMC3347713)

**A**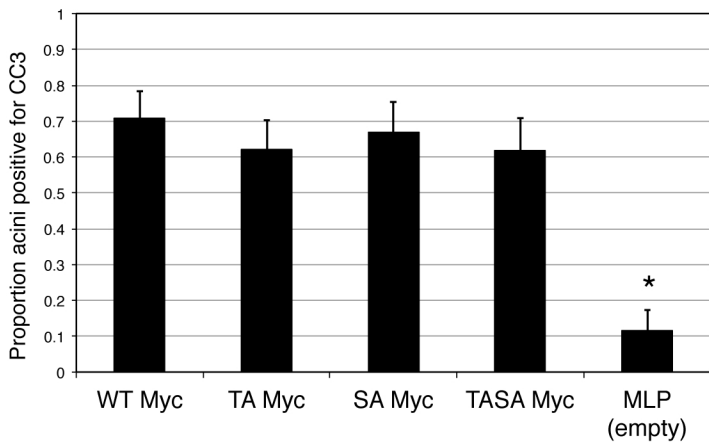**B**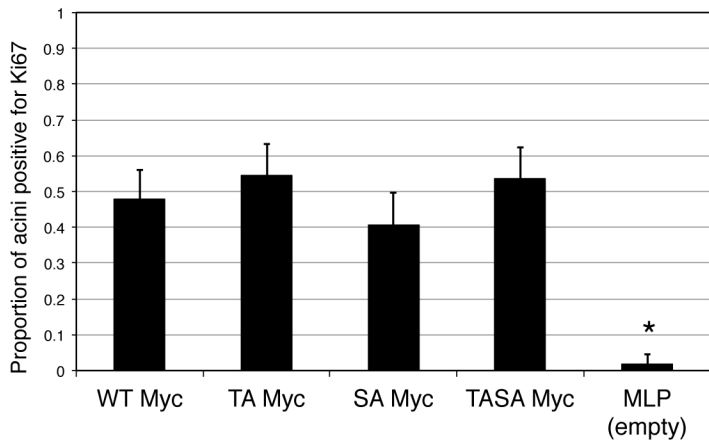

Supplement: NIHMS367034-supplement-sfig_1.pdf [file NIHMS367034-supplement-sfig_1.pdf]

3D day 8

3D day 12

3D day 16

MLP  
(empty)

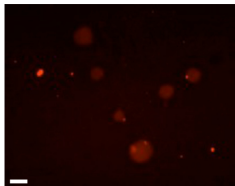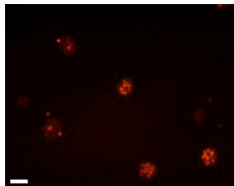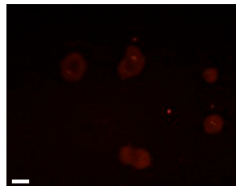

MLP  
Myc

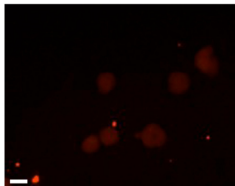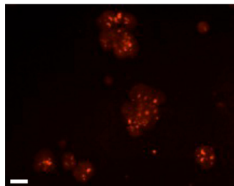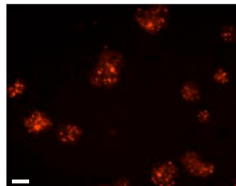

MLP  
 $\Delta$ MbI Myc

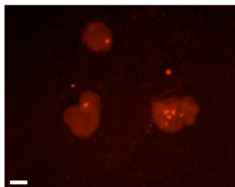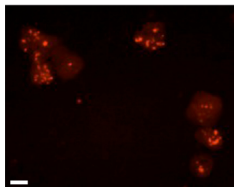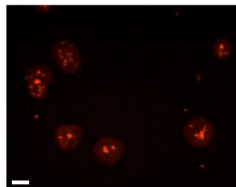

MLP  
 $\Delta$ MbII Myc

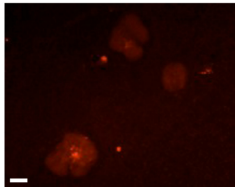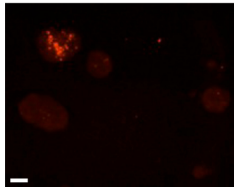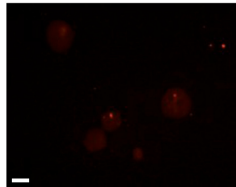

MLP  
 $\Delta$ MbIII Myc

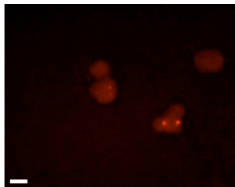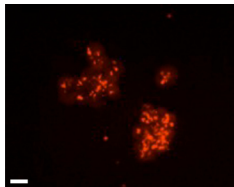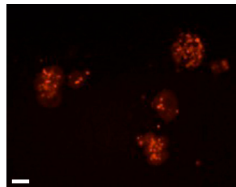

Supplement: NIHMS367034-supplement-sfig_2.pdf [file NIHMS367034-supplement-sfig_2.pdf]

**A**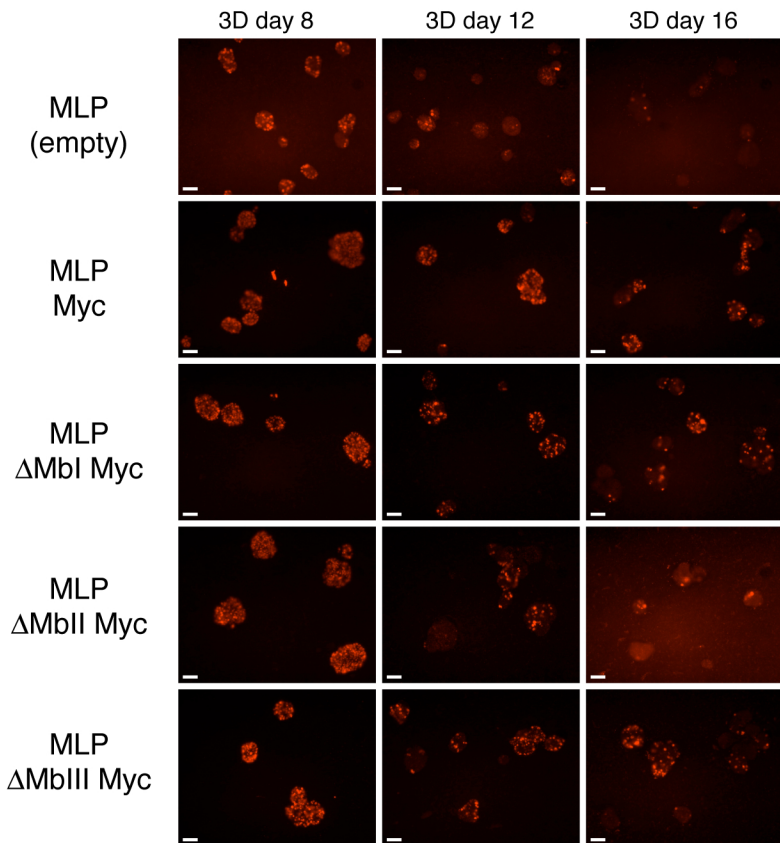**B**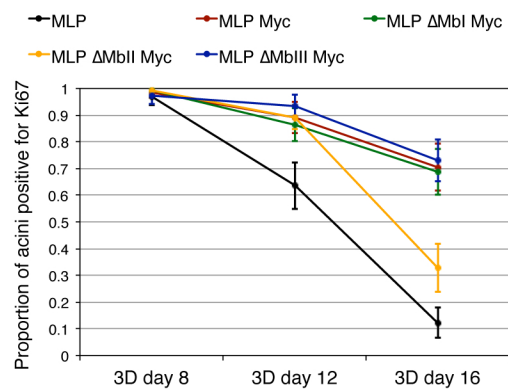**C**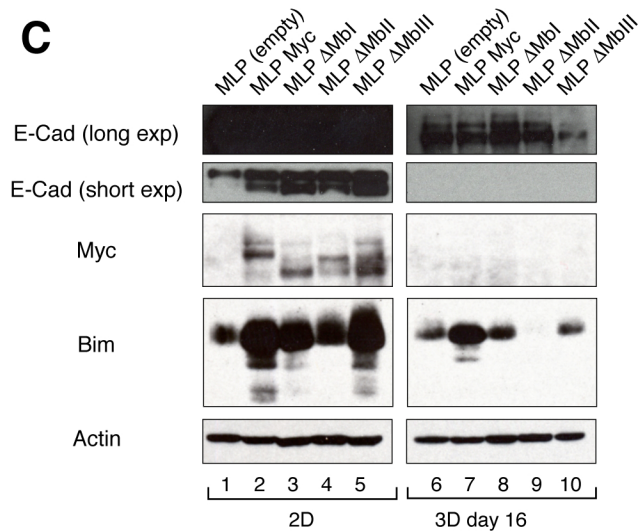

Supplement: NIHMS367034-supplement-sfig_3.pdf [file NIHMS367034-supplement-sfig_3.pdf]

**A**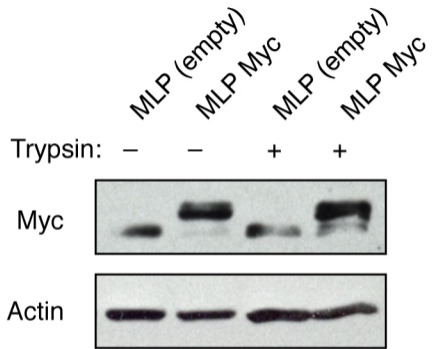**B**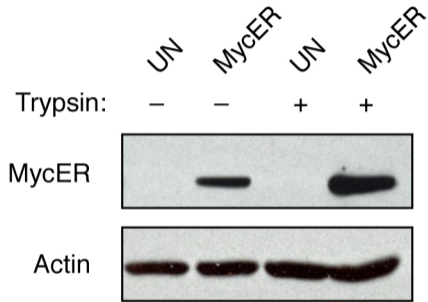

Supplement: NIHMS367034-supplement-sfig_4.pdf [file NIHMS367034-supplement-sfig_4.pdf]

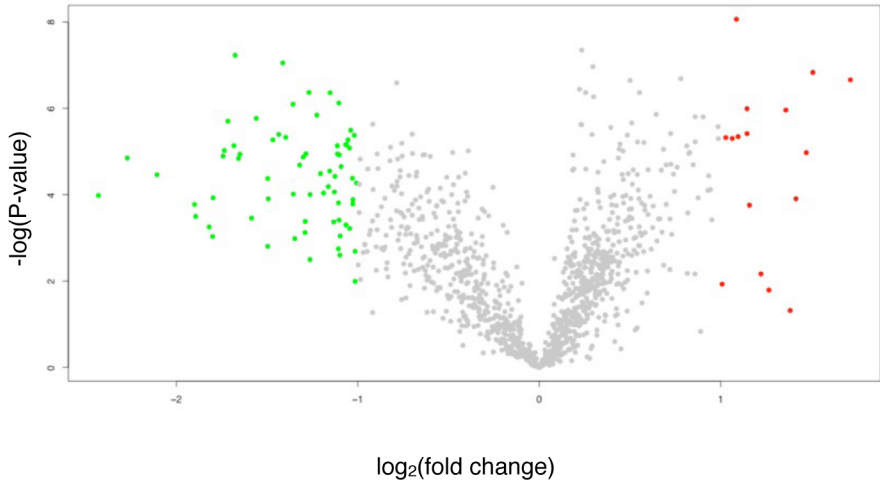

Supplement: NIHMS367034-supplement-sfig_5.pdf [file NIHMS367034-supplement-sfig_5.pdf]

**A**

Adenoviral Myc expression in 3D relative to endogenous Myc in 2D

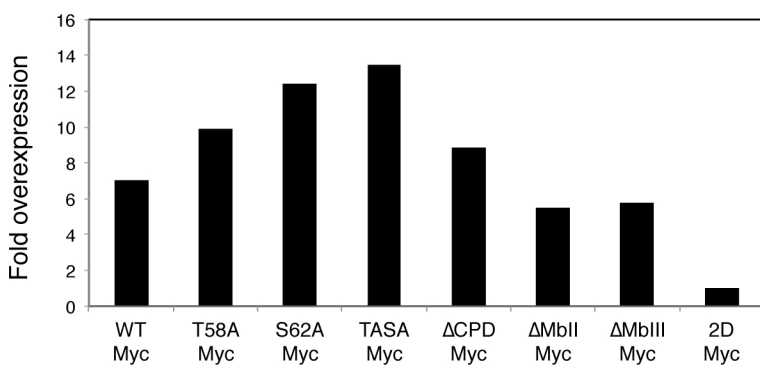**B**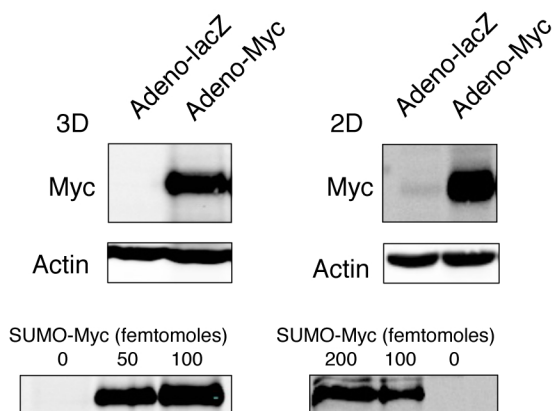**C**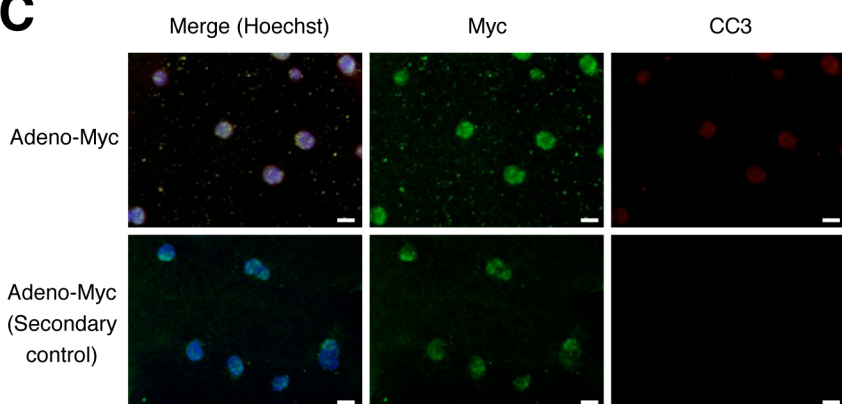**D**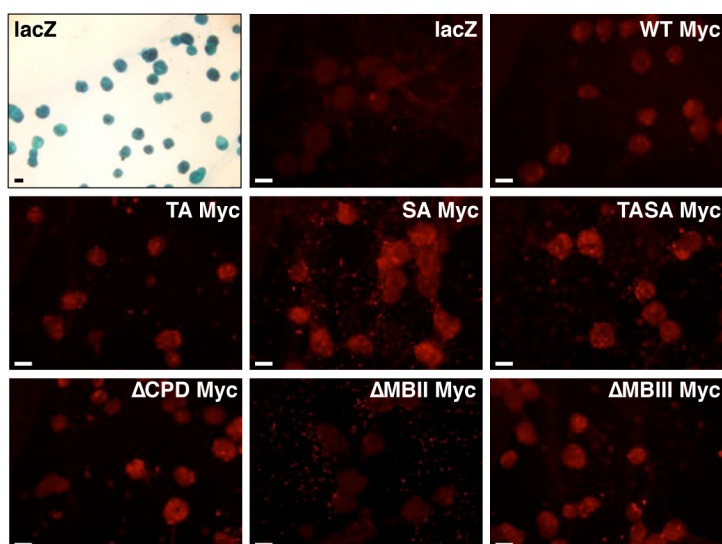

Supplement: NIHMS367034-supplement-sfig_6.pdf [file NIHMS367034-supplement-sfig_6.pdf]
